# Supplementary material
Source: Springer Nature journal article supplement (https://www.springermedizin.de/resource/supplementary/12888_2014_1654_MOESM3_ESM.pdf/9481114)

**A****(A) Raw dMRI image**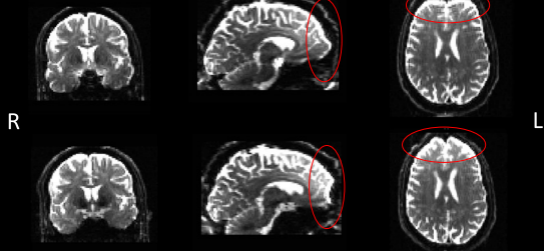**(B) dMRI image corrected for distortions**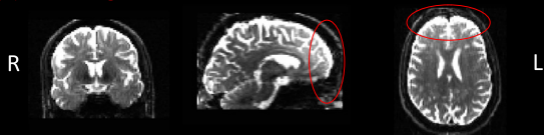**(C) dMRI image derived metrics (FA, MD)**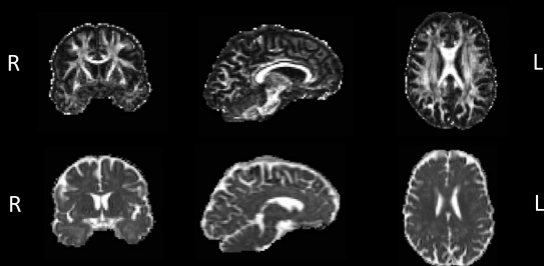**B**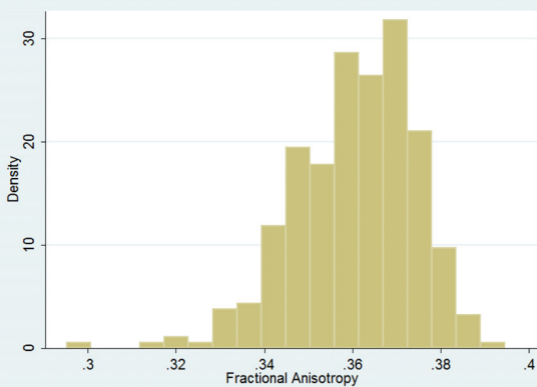

Supplement: MOESM3 [file 9481114]
